# Supplementary material for: Neuroprotective effects of electroacupuncture in ischemic stroke: from mechanisms to clinical implications
Source: Frontiers journal article supplement (doi:10.3389/fnagi.2025.1562925), 2025-04-24

20:16

84

群聊 (3)

大家看一下这个意见，考虑一下修改的地方。老师说图像部分内容可能太分散了，需要有重点，复杂一些。然后就是机制打磨一下，增加陈述性表达，减少描述性的内容。大家现在看文章多了可能有更深的了解，按照以上要求修改的新内容都可以添加进文章。

Manuscript1.docx

1.35MB

W

这个是我添加过关于对比临床治疗缺血性脑卒中的内容的 大家可以在这个基础上修改 用审阅模式跟以前一样 但是大家这次要好好考虑一下怎么改善这个文章，然后不要着急

大家可以先考虑修改着，因为这两天我不方便开会，我们院有夏令营这两天刚好出发，大家有什么想法就在群里说，过两天我们再讨论一下什么时候改好

20:16

Group Chat (3)

Take a look at this opinion and consider changes. The teacher said the images might be too scattered and needed to be focused and complicated. Then there's the mechanical polish -- more declarative and less descriptive. Now that you have read the article more, you may have a deeper understanding, according to the above chapter.

Seek to modify the new content can be added to the article

Manuscript1.docx

1.35MB

W

This is the content I have added about the comparative clinical treatment of ischemic stroke. You can modify it on this basis by using the review mode as before. However, you should carefully consider how to improve this article

Then don't worry.

Now that you have read the article more, you may have a deeper understanding, according to the above chapter. I am not convenient to have a meeting in these two days. If you have any ideas, please say it in the group, and we will discuss when to correct it in two days

20:17

84

群聊 (3)

...

增加对炎症段的分析，找最新文献看是否有新的方向与假设  
重新做一个更好看的 figure1, figure2 增加一些通路  
检查修改文章的英文表达  
关于强调研究电针的吸引力，在机制段增加对应用普遍性的讨论  
在讨论部分删去冗余的文字，增加对电针研究意义以及临床应用的强调，增加局限性以及未来研究方向

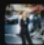

这是我打算做的

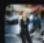

2024年7月9日 15:53

大家也在群里写一下觉得自己需要修改的地方

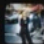

然后要多长时间

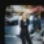

我觉得我大概需要一个星期

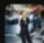

因为我们有时差我白天还有课上，似乎不太方便开会 🤔

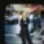

20:17

Group Chat (3)

...

Increase the analysis of the inflammatory segment, find out the latest literature to see if there are new directions and hypotheses, and make a better figure1. figure2 adds some channels to check and modify the English expression of the article. It emphasizes the attractiveness of studying electroacupuncture, adds discussion on the universality of application in the mechanism section, and deletes redundant words in the discussion section. To increase the emphasis on the research significance and clinical application of electroacupuncture, and to increase the limitations and future research directions

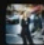

This is what I intend to do

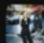

July 9, 2024 15:53

In the group, please write about what you think you need to change

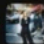

And how long will it take

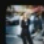

I think I need about a week

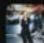

Since we have time difference and I have classes during the day, it doesn't seem to be convenient for meetings 🤔

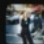

20:17

84

群聊 (3)

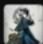

葛鑫怡

figure 7 改善或考虑删除；检查和修改英文表达；在铁死亡、神经元凋亡部分根据文献增加基于现有研究的深入分析及新假设；讨论部分适当增加电针对多种类型中风患者的潜在益处及与现有治疗方法的结合；在机制段视情况增加强调提供的新视角和理解等。应该要9-10天。

2024年7月10日 14:39

好滴，那我们就开始修改，按九到十天算

记得用审阅模式噢

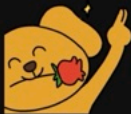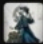

葛鑫怡

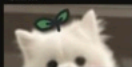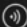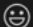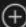

20:17

84

Group Chat (3)

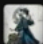

Ge Xinyi

figure 7 Improve or consider deleting; Check and revise English expressions; In the parts of iron death and neuronal apoptosis according to the literature to add in-depth analysis based on existing studies and new hypotheses; Discussion of the potential benefits of appropriate addition of electricity to patients with multiple types of stroke and its integration with existing treatments; And add emphasis on providing new perspectives and understanding, as appropriate, in the mechanism section. It should take 9-10 days.

Jul 10, 2024 14:39

Ok, so let's start revising, on the order of nine or ten days

Remember to use review mode

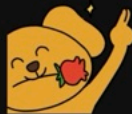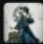

Ge Xinyi

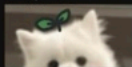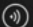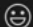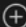

20:17

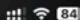

## 群聊 (3)

2024年2月11日 13:57

1. Introduction  
 2. cerebral ischemia reperfusion injury  
 3. electroacupuncture  
 4. 电针刺激对缺血再灌注损伤的保护作用  
 4.1 acupoint 穴位  
 4.2 excitatory stress 激发应激  
 4.3 neuronal inflammatory response  
 4.4 其他  
 4.4.1 BBB 血脑屏障  
 4.4.2 angiogenesis 血管生成  
 4.4.3 brain death  
 5. prognosis  
 6. conclusion

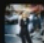

这是我整理的大纲

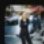

大家整理好可以看看怎么修改或者补充一些

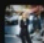

然后我们完成大纲之后要发给老师，让他看看

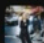

2024年2月11日 14:11

"葛鑫怡" 撤回了一条消息

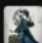

葛鑫怡

好，那要不搞一个可共同修改的文档发群里，方便修改补充 🍻🍻

好滴，那也可以

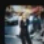

金山文档

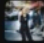

20:17

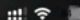

## Group Chat (3)

14 Noon Month 11 13.5/

1. Introduction  
 2. cerebral ischemia reperfusion injury  
 3. electroacupuncture  
 4. electroacupuncture protection of ischemia reperfusion injury  
 4.1 acupoint  
 4.2 excitatory stress  
 4.3 neuronal inflammatory response  
 4.4 other  
 4.4.1 BBB blood brain barrier  
 4.4.2 angiogenesis promotes angiogenesis  
 4.4.3 brain death  
 5. prognosis  
 6. conclusion

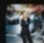

This is the outline I put together

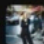

You can see how to modify it or To add some

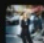

Then we have to send the outline to the senior after we finish it Teacher, let him have a look

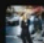

Feb 11, 2024 at 14:11

"Ge Xinyi" retracted a message

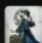

Ge Xinyi OK, let's make a joint revision

The document is sent in the group, easy to modify and supplement 🍻🍻

B: OK, that's OK too

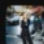

Kingsoft Documentation

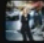

20:17

84

群聊 (3)

曹毓隆

我稍微加了一些

葛鑫怡

我也是

就是我的想法是

1 autophagy 自噬  
2 oxidative stress 氧化应激  
3 neuroinflammatory 神经炎症

这三个会是一个大的分类

然后更细的通路说明

我们可以把它们放进这三种类型中归类

2024年2月11日 15:23

到时候我们会选择自己的

一部分

就可以自行去调整

20:17

84

Group Chat (3)

Tsao Yulong

I added a little more

Ge Xinyi

Me too

That's what I was thinking

1 autophagy  
2 oxidative stress  
3 neuroinflammatory, 3 neuroinflammatory

These three would be a big category

And then a more granular path description

We can put them into these three categories

February 11, 2024 at 15:23

We'll pick our own then

Part

Permissions: Mafin Tsai (1)

20:17

84

群聊(3)

就可以自行去调整

曹毓隆

那我把我们的大纲发给老师

葛鑫怡

噢噢，懂了

曹毓隆

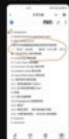

曹毓隆

这个应该不用加吧

曹毓隆

每个实验用的穴位都不太一样

我觉得这个可以放到3

曹毓隆

20:17

84

Group Chat (3)

You can adjust on your own

Tsao Yulong

Then I'll send our outline to the teacher

Ge Xinyi

Oh oh, got it

Tsao Yulong

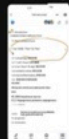

Tsao Yulong

I don't think you need this

Tsao Yulong

The acupuncture points used in each experiment are different

I think this one can go up to 3

Tsao Yulong

20:18

84

群聊(3)

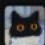

曹毓隆

先发老师看看行👉

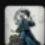

葛鑫怡

唔，主要是我看实验只是探究了这三个穴位上的，没有全部

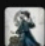

葛鑫怡

okk

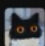

曹毓隆

还有我看和线粒体相关的机制研究的挺多的

2024年2月11日 15:27

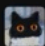

曹毓隆

这个应该放到哪儿嘞

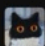

曹毓隆

到时候会涉及么

因为这个是一个初步的大纲

我还没有细看文章

如果我们之后看完了觉得

20:18

84

Group Chat (3)

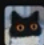

Tsao Yulong

Starting teacher look OK 👉

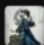

Ge Xinyi

Well, mainly, I think the experiment only explored these three points, not all of them

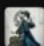

Ge Xinyi

okk

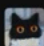

Cao Yulong

And I've seen a lot of research on mechanisms related to mitochondria

February 11, 2024 at 15:27

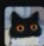

Tsao Yulong

Where should I put this

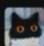

Tsao Yulong

Will it be covered then

Because this is a preliminary outline

I haven't looked at the article

If we read it afterwards and feel

20:18

84

群聊(3)

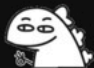

这些文献可以支撑的话，我们可以修改一下线粒体自噬的那个小标题，然后子标题加入这个相关的说明

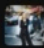

2024年2月12日 23:16

老师说我们的大纲没有问题，就按这个写。我已经找好了文献放在了共享文档里，需要我们一起来看。这里有157篇，但是不是所有的文献都与我们的文章有关系，所以看的时候排除掉，也没有那么多。我们把这些文献分成三等分来读，每人一部份，文章提到与我们大纲思路有关的重点部分可以总结或者摘到表格中的简述一栏，还可以将文章大致按我们大纲的结构备注一下可以引用在哪里。我已经把三部分表成三个颜色，文献按时间顺序排列，大家可以选择一下负责哪部份的阅读

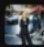

20:18

84

Group Chat (3)

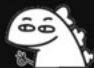

If the literature supports it, we can revise the subheading of mitochondrial autophagy and add this related note to the subheading

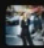

February 12, 2024 at 23:16

The teacher said there was no problem with our outline, so write it as follows. I have found the literature and put it in the shared document. We need to look at it together. There are 157 literatures here, but not all of them are related to our article, so it is not that many to exclude when we read them. We will divide the literature into three parts to read, each person has a part. The key parts of the article that are related to our outline can be summarized or summarized in the description column of the table, and the article can also be noted roughly according to the structure of our outline where can be quoted. I have put the three parts into three colors, the documents are arranged in chronological order, you can choose which part is responsible for

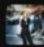

Reading



20:18

84

群聊 (3)

这样是为了我们可以在写文章的时候，更方便的查看文献的概述

你撤回了一条消息

金山文档 | WPS 云文档

文献.xlsx

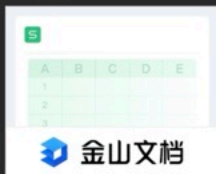

小程序

大家搜索文献的时候，如果pubmed常规搜索不太全，可以用pubmed中的mesh搜索

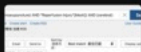

这样会更全一些

20:18

84

Group Chat (3)

This is so that when we write articles, it is more convenient to view the overview of the literature

You have retracted a message

 Microsoft Documentation |  
 WPS Cloud Documentation  
 Document.xlsx
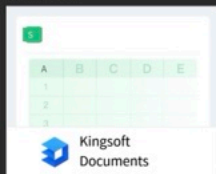

Small program

When you search for literature, if the regular pubmed search is not complete, you can use the mesh search in pubmed

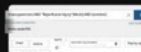

This will make it a little more complete

20:18

84

群聊(3)

4044 4-47 140 40-41

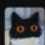

曹毓隆

收到

关于文章写作的分工，我们明天晚上群语音讨论一下怎么样

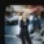

2024年2月12日 23:22

或者说大家明天什么时候有时间

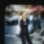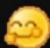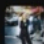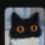

曹毓隆

我应该只有晚上 ok

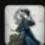

葛鑫怡

好的，我都可以

好滴

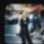

那我们晚上七点开个小会

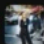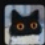

曹毓隆

ok

20:18

84

Group Chat (3)

2024-2024 for 12 Feb

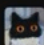

Tsao Yulong

Received

As for the division of labor in essay writing, how about we have a group voice discussion tomorrow evening

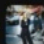

February 12, 2024 at 23:22

Or what time is everyone free tomorrow

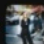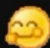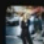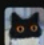

Tsao Yulong

I should only be ok at night

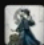

Ge Xinyi

Yes, I can do any of them

Goody

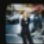

Let's have a little meeting at 7:00 p.m

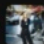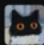

Cao Yulong

ok

20:18

84

群聊(3)

OK

大家今天可以把阅读的分类选一下

三部分就是文章的时间不太一样

我都可以你们先选

2024年2月12日 23:27

曹毓隆

那我就蓝色的吧

葛鑫怡

那我绿色吧

参考文献94篇(时间  
降序)共享文档.xlsx  
45KB

这是我以前文章的文档

大概就是这个意思

20:18

84

Group Chat (3)

OK

You can choose the categories of reading today

The three parts are the time of the article is not the same

I can give you the first choice

Feb 12, 2024 23:27

Tsao Yulong

I'll take the blue one then

Ge Xinyi

I'll be green then

References 94 (in descending  
order of time) Share  
document.xlsx  
45KB

This is a file from my previous article

That's roughly the idea

20:18

84

群聊(3)

葛鑫怡

不好意思, 我现在感冒高烧要输液🥲, 我一会大概不会怎么说  
话, 不太方便🥲🥲

2024年2月13日 18:59

好的好的, 没关系, 主要就是  
我们分一下工

曹毓隆

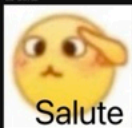

葛鑫怡

好的, 谢谢🌸🌸

朱古力发起了语音通话

2024年2月13日 19:05

语音通话已经结束

2024年2月13日 19:26

20:18

84

Group Chat (3)

Ge Xinyi

I'm sorry, I have a cold and a high fever  
and need infusion. I probably won't talk  
for a while. It's not convenient🥲🥲

February 13, 2024 18:59

Yes, yes, no problem. The main  
thing is that we share the work

Cao Yulong

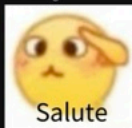

Ge Xinyi

Ok, thanks🌸🌸

A: Chocolate initiated a voice call

Feb 13, 2024 19:05

The robocall has concluded

February 13, 2024 at 19:26

20:18

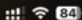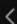

群聊 (3)

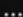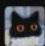

曹毓隆

文献简述.xlsx

35KB

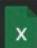

微信电脑版

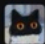

曹毓隆

姐这能行不

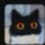

曹毓隆

一些没有文献全文的我就直接删掉了

就是你看我上次发那个大表格

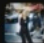

你看看能复制进去不

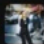

2024年3月3日 15:47

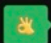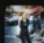

2024年3月3日 15:47

我忘记说了

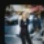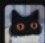

曹毓隆

好哒

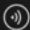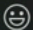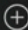

20:18

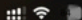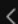

Group Chat (3)

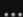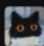

Tsao Yulong

Literature Brief.xlsx

35KB

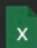

Wechat computer version

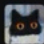

Cao Yulong

Sister this can not

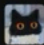

Tsao Yulong

Some of the literature without the full text I directly deleted

Just look at the big table I sent last time

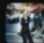

See if you can copy it

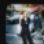

March 3, 2024 15:47

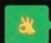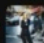

March 3, 2024 15:47

I forgot to mention that

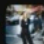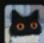

Tsao Yulong

OK

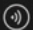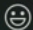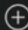

Supplement: Data_Sheet_1.pdf [file Data_Sheet_1.pdf]
